# Supplementary material
Source: publisher figshare collection journal article supplement (https://acs.figshare.com/ndownloader/files/4526629)
Supplement: Supplementary file 1 [file 4526629]

## TOC

Spectroscopic investigation of the anatase to rutile transformation of sol-gel synthesised TiO<sub>2</sub> photocatalysts

Nicholas T. Nolan,<sup>a,b</sup> Michael K. Seery\*<sup>a</sup> and Suresh C. Pillai<sup>b</sup>

Spectroscopic analysis concluded that the *syn-anti* binding of formate group in the titania photocatalyst precursor hinders cross linking of the gel network, resulting in a weakened structure and thus causing the anatase to rutile transformation temperature to occur at a lower temperature than with the *syn-syn* mode of binding where more ordered gel networks are formed.

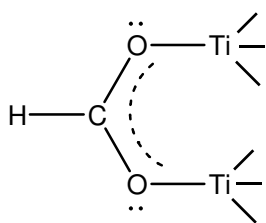

(a): *syn-syn*

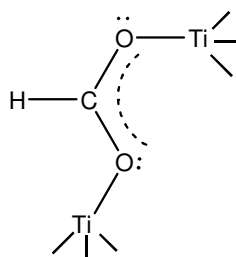

(b): *syn-anti*
